1 **Global longitudinal strain and plasma biomarkers for prognosis in heart failure**  
2 **complicated by diabetes.**

3  
4 Nithin R. Iyer MD<sup>1,2</sup>, Siew-Pang Chan PhD<sup>3</sup>, Oi Wah Liew<sup>4</sup>, Jenny P.C. Chong<sup>4</sup>, Jennifer A.  
5 Bryant PhD<sup>1</sup>, Thu-Thao Le PhD<sup>1,5</sup>, Chanchal Chandramouli PhD<sup>6,7</sup>, Patrick J. Cozzone PhD<sup>8</sup>,  
6 Frank Eisenhaber MD PhD<sup>9,10,11</sup>, Roger Foo MD<sup>4,10</sup>, A. Mark Richards MD PhD<sup>4,12</sup>, Carolyn  
7 S.P. Lam MD PhD<sup>1,6,7,13</sup>, Martin Ugander§ MD PhD<sup>2,14</sup>, Calvin W-L. Chin§ MD PhD<sup>5,6</sup> and  
8 on behalf of the ATTRaCT investigators  
9

10 <sup>1</sup>National Heart Research Institute Singapore, National Heart Centre Singapore, Singapore

11 <sup>2</sup>Kolling Institute, Royal North Shore Hospital, and University of Sydney, Australia

12 <sup>3</sup>Yong Loo Lin School of Medicine, National University of Singapore, Singapore

13 <sup>4</sup>Cardiovascular Research Institute, Yong Loo Lin School of Medicine, National University  
14 of Singapore, Singapore

15 <sup>5</sup>Cardiovascular Sciences ACP, Duke NUS Medical School, Singapore

16 <sup>6</sup>National Heart Centre Singapore, Singapore

17 <sup>7</sup>Duke-National University Singapore, Singapore

18 <sup>8</sup>Singapore Bioimaging Consortium, Agency for Science, Technology and Research,  
19 Singapore

20 <sup>9</sup>Bioinformatics Institute, Agency for Science, Technology and Research, Singapore

21 <sup>10</sup>Genome Institute of Singapore, Agency for Science, Technology and Research, Singapore

22 <sup>11</sup>School of Biological Sciences, Nanyang Technological University, Singapore

23 <sup>12</sup>Christchurch Heart Institute, University of Otago, Christchurch, New Zealand

24 <sup>13</sup>University Medical Centre Groningen, Groningen, The Netherlands

25 <sup>14</sup>Department of Clinical Physiology, Karolinska University Hospital, and Karolinska  
26 Institutet, Stockholm, Sweden

27 § denotes equal contribution  
28  
29

30 **Address for Correspondence**

31  
32 Calvin W-L. Chin, MD PhD

33 Department of Cardiology, National Heart Centre Singapore, 5 Hospital Drive Singapore  
34 169609

35 E: [calvin.chin.w.l@singhealth.com.sg](mailto:calvin.chin.w.l@singhealth.com.sg)

36 T: +65 67048962  
37  
38

39

40

41

42 **Abstract**

43 **Background:** Heart failure (HF) and diabetes are associated with increased incidence and  
44 worse prognosis of each other. The prognostic value of global longitudinal strain (GLS)  
45 measured by cardiovascular magnetic resonance (CMR) has not been established in HF  
46 patients with diabetes.

47 **Methods:** Consecutive patients (n=315) with HF underwent CMR at 3T, including GLS, late  
48 gadolinium enhancement (LGE), native T1, and extracellular volume fraction (ECV)  
49 mapping. Plasma biomarker concentrations were measured including: N-terminal pro B-type  
50 natriuretic peptide(NT-proBNP), high-sensitivity troponin T(hs-TnT), growth differentiation  
51 factor 15(GDF-15), soluble ST2(sST2) and galectin 3(Gal-3). The primary outcome was a  
52 composite of all-cause mortality or HF hospitalisation.

53 **Results:** Compared to those without diabetes (n=156), the diabetes group (n=159) had a  
54 higher LGE prevalence (76 vs 60%, p<0.05), higher T1 (1285±42 vs 1269±42ms, p<0.001)  
55 and higher ECV (30.5±3.5 vs 28.8±4.1%, p<0.001). The diabetes group had higher NT-pro-  
56 BNP, hs-TnT, GDF-15, sST2 and Gal-3. Diabetes conferred worse prognosis (hazard ratio  
57 (HR) 2.33 [95% confidence interval (CI) 1.43-3.79], p<0.001). In multivariable Cox  
58 regression analysis including clinical markers and plasma biomarkers, sST2 alone remained  
59 independently associated with the primary outcome (HR per 1 ng/mL 1.04 [95% CI 1.02-  
60 1.07], p=0.001). In multivariable Cox regression models in the diabetes group, both GLS and  
61 sST2 remained prognostic (GLS: HR 1.12 [95% CI 1.03-1.21], p=0.01; sST2: HR per 1  
62 ng/mL 1.03 [95% CI 1.00-1.06], p=0.02).

63 **Conclusions:** Compared to HF patients without diabetes, those with diabetes have worse  
64 plasma and CMR markers of fibrosis and a more adverse prognosis. GLS is a powerful and  
65 independent prognostic marker in HF patients with diabetes.

66

67 **Keywords**

68 magnetic resonance imaging, heart failure, global longitudinal strain, biomarkers, prognosis

69

70

71

72

73

74

75

76

77

78

79

80

81

82

83

84

85

86

87

88

89

90 **Background**

91 The Asian continent has the highest prevalence of heart failure (HF) cases globally [1].

92 Diabetes is especially common in South East Asian HF populations, where a unique ‘lean-  
93 diabetic’ phenotype with worse outcomes has been identified [2]. The Asian Sudden Cardiac  
94 Death in Heart Failure (ASIAN-HF) registry (across 11 Asian countries) reported a 42.5%  
95 prevalence of diabetes among HF patients, specifically in higher-income countries such as  
96 Singapore, Hong Kong, and Thailand [3].

97

98 The diabetic heart is characterised by a number of structural abnormalities including diffuse  
99 interstitial myocardial fibrosis, myocyte hypertrophy, and impaired coronary microvascular  
100 perfusion, which have all been implicated in the development of both diastolic and systolic  
101 dysfunction [4, 5]. Patients with HF and diabetes have consistently worse clinical outcomes,  
102 including higher risk of hospitalisation for HF and death, compared to those without diabetes  
103 [6-8]. These findings appear to hold regardless of whether the HF is ischaemic or non-  
104 ischaemic in etiology, and regardless of left ventricular (LV) ejection fraction [7, 8].

105

106 Cardiac magnetic resonance (CMR) imaging has become the non-invasive reference standard  
107 for evaluating HF due to its ability to accurately assess cardiac morphology, function, and  
108 myocardial tissue characteristics. In particular, late gadolinium enhancement (LGE) permits  
109 visualisation of focal replacement myocardial fibrosis, while T1 mapping pre- and post-  
110 gadolinium contrast enables non-invasive measurement of the myocardial extracellular  
111 volume fraction (ECV), a quantitative marker of myocardial diffuse interstitial fibrosis.  
112 Additionally, global longitudinal strain (GLS), defined as the change in the LV myocardial  
113 length between diastole and systole divided by the original end-diastolic length, provides a

114 measure of LV systolic function by CMR that is effectively the same as GLS measured by  
115 echocardiography [9, 10].

116

117 Patients with diabetes frequently have impaired GLS and have a higher degree of myocardial  
118 fibrosis as assessed by ECV and histology [11, 12]. GLS by CMR appears to have prognostic  
119 value in HF regardless of ejection fraction and whether the cause of HF is ischemic or non-  
120 ischemic [13-15]. There is a growing body of literature demonstrating the prognostic value of  
121 GLS in asymptomatic patients with diabetes [16, 17]. However, the prognostic utility of GLS  
122 in diabetes patients with established HF failure is unknown.

123

124 Growth differentiation factor-15 (GDF-15), soluble ST2 (sST2) and galectin 3 (Gal-3) are  
125 circulating plasma biomarkers associated with inflammation, fibrosis and cardiac remodelling  
126 [18]. Plasma concentrations of these biomarkers appear to provide prognostic information in  
127 HF patients beyond established markers including cardiac troponins and natriuretic peptides  
128 [18-21]. The prognostic relevance of these biomarkers has not yet been established in HF  
129 patients with diabetes.

130

131 This study aimed to assess the prognostic significance of GLS by CMR and novel HF plasma  
132 biomarkers associated with inflammation and fibrosis in a cohort of patients with HF and  
133 diabetes across the spectrum of LV ejection fraction. We hypothesized that GLS would have  
134 an incremental prognostic association in this group, beyond plasma HF biomarkers, LV  
135 ejection fraction and CMR markers of myocardial fibrosis.

136

## 137 **Methods**

### 138 *Study Population*

139 Patients with HF were recruited prospectively across six tertiary cardiac centres in Singapore  
140 (Asian neTwork for Translational Research and Cardiovascular Trials [ATTRaCT],  
141 ClinicalTrials.gov NCT02791009). Patients were included if they presented to hospital with a  
142 primary diagnosis of HF, or if they attended a hospital clinic within 6 months of an episode of  
143 decompensated HF (requiring hospitalization or treatment in an out-patient setting). In all  
144 cases, a trained cardiologist adjudicated the clinical diagnosis of HF. The exclusion criteria  
145 were: HF primarily due to severe valve disease, HF due to acute coronary syndrome resulting  
146 in a transient episode of acute pulmonary oedema, severe renal failure (estimated glomerular  
147 filtration rate  $< 15 \text{ mL/min per } 1.73\text{m}^2$ ), specific causes of HF (constrictive pericarditis,  
148 complex adult congenital heart disease, hypertrophic cardiomyopathy, eosinophilic  
149 myocarditis, cardiac amyloidosis, and acute chemotherapy-induced cardiomyopathy), isolated  
150 right HF, and life threatening non-cardiac co-morbidity with life expectancy of  $< 1$  year. All  
151 patients underwent clinical assessment at baseline. Diabetes status was identified by baseline  
152 questionnaire at recruitment.

153

#### 154 *Biomarkers*

155 Blood was collected in dipotassium ( $\text{K}_2$ )-EDTA vacutainer tubes and transported on ice for  
156 processing within one hour. Plasma was separated by centrifugation at 3500g for 10 minutes  
157 at  $4^\circ\text{C}$  and stored at  $-80^\circ\text{C}$  until analysis.

158

159 Plasma N-terminal pro B-type natriuretic peptide (NT-proBNP) and high-sensitivity troponin  
160 T (hs-TnT) were measured by electrochemiluminescence immunoassay using the Elecsys  
161 proBNP G2 V2.1 and Elecsys Troponin T hs V2.1 assays on the Cobas e411 immuno-  
162 analyser (Roche Diagnostic GmbH, Mannheim, Germany). The measurement ranges of NT-  
163 proBNP and hs-TnT were 10-35000 pg/ml and 3-10000 pg/ml, respectively. Laboratory

164 average concentration and inter-assay coefficient of variation (%CV) of low (NT-proBNP:  
165 147 pg/ml, 4.48%; hs-TnT: 26.8 pg/ml, 5.05%) and high (NT-proBNP: 4679 pg/ml, 4.97%;  
166 hs-TnT: 2120 pg/ml, 3.69%) quality control samples of the NT-proBNP and hs-TnT assays  
167 were established over 84 and 73 independent assays, respectively.

168

169 Human GDF-15 (R&D Systems, Minneapolis, MN, USA; Cat#DGD150), sST2 (Presage ST2  
170 assay, Critical Diagnostics, California, USA) and Gal-3 (R&D Systems, Minneapolis, MN,  
171 USA; Cat#DGAL30) were measured by ELISA on the Enspire Multimode Microplate Reader  
172 (Perkin Elmer, Waltham, MA, USA). Results were interpolated from standard curves fitted  
173 on 5-parameter logistic model (5-PL) using the instrument's Enspire® software. Laboratory  
174 inter-assay %CV of quality control samples were 7.41% at 126 pg/ml, 7.71 % at 360 pg/ml  
175 and 8.43% at 778 pg/ml for GDF-15 (n=98), 18.0% at 30.0 ng/ml and 15.2% at 63.6 ng/ml  
176 for sST2 (n=98) and 10.4% at 0.83 ng/ml, 10.6% at 2.41 ng/ml and 12.3% at 4.82 ng/ml for  
177 Galectin-3 (n=56).

178

### 179 *Clinical Outcomes*

180 The primary outcome was a composite of time to either first hospitalization for HF  
181 (regardless of prior history of hospitalization for HF) or all-cause mortality. Follow-up was  
182 conducted through a clinic visit at 6 months after baseline assessment and structured phone  
183 interviews with the participants at the 1- and 2-year timepoints. Data in patients who were  
184 lost to follow-up were censored at the date when the patient was last known to be alive and  
185 had not experienced an event.

186

### 187 *Cardiovascular magnetic resonance image acquisition*

188 All patients in the ATTRaCT cohort were invited and assessed for suitability for CMR. Those

189 who agreed and were eligible underwent a standardized CMR protocol with a 3 Tesla MRI  
190 scanner (Ingenia, Philips Healthcare, Best, The Netherlands). Balanced steady-state free  
191 precision cines were acquired in the standard long-axis views and a short-axis stack from  
192 base to apex, as described previously [22]. LGE images were acquired at 10 min after 0.1  
193 mmol/kg of gadobutrol (Gadovist®, Bayer Pharma AG, Germany) with a phase sensitive  
194 inversion-recovery gradient-echo imaging sequence. Typical parameters were: repetition time  
195 (TR) = 6.1 ms; echo time (TE) = 3 ms; time to inversion (TI) = 320–340 ms, flip angle 25°,  
196 voxel size = 1.5x1.7x8 mm, SENSE factor = 2.4, slice thickness 8mm with 2mm gap to  
197 match short-axis cine slice positions. The inversion time for optimal myocardial nulling was  
198 selected from an inversion time scout sequence. T1 maps were acquired at the basal and mid-  
199 ventricular short-axis levels, pre- and 15-min post-contrast with modified Look-Locker  
200 Inversion-recovery (MOLLI) 5s(3s)3s and 4s(1s)3s(1s)2s acquisition schemes, respectively  
201 [23].

202

### 203 *CMR analysis*

204 Image analysis was performed using CVI42 software (Circle Cardiovascular Imaging,  
205 Calgary, Canada) by trained imaging fellows at the National Heart Research Institute of  
206 Singapore CMR Core Laboratory, who were blinded to the clinical information of the  
207 patients. Ventricular volumes, mass and ejection fraction were measured from the short-axis  
208 cine stack, using manual contouring of the left ventricle in end-diastole and end-systole,  
209 excluding papillary muscles, as detailed previously [22]. LV volumes and mass data were  
210 indexed to body surface area. The presence of LGE was assessed qualitatively by two readers  
211 according to the recommendations by the Society of CMR [24]. Average native and post-  
212 contrast myocardial T1 values were measured by placing a region of interest (ROI) within the  
213 middle third of the short-axis myocardial wall at the basal- and mid-ventricular levels, while

214 avoiding regions of focal LGE. The myocardium-blood pool interface was carefully avoided  
215 in order to prevent partial volume effects. Pre- and post-contrast blood T1 values were  
216 measured in a ROI drawn within the blood pool. ECV was calculated from the pre- and post-  
217 contrast average blood and myocardial T1 values, as described previously [25, 26].

218 Myocardial strain was analysed in the cine images using the Tissue Tracking Plugin [27].

219

## 220 *Statistics*

221 Normality was assessed for continuous variables using the Shapiro-Wilk test. Normally  
222 distributed data are presented as mean  $\pm$  standard deviation. Non-normally distributed data  
223 are presented as median [interquartile range]. Comparisons were performed for continuous  
224 variables using the parametric Student *t*-test or the non-parametric Mann-Whitney U test.

225 Categorical variables are presented as number (percentage) and compared using the  $\chi^2$  test.

226

227 Univariable Cox regression analysis was performed to identify prognostic variables in the  
228 entire cohort and also in the diabetes subgroup. Clinically relevant variables (age, sex, body  
229 mass index, diabetes, smoking, coronary artery disease, hypertension, New York Heart  
230 Association functional class and systolic blood pressure), circulating biomarkers (NT-  
231 proBNP, hs-TnT, GDF-15, sST2 and Gal-3) and CMR markers of function, remodelling and  
232 fibrosis (LV end diastolic volume index, mass index, ejection fraction, GLS, LGE, Native T1,  
233 ECV) were tested in the Cox models. Covariates with a p-value  $<0.05$  in univariable analyses  
234 were entered into the multivariable Cox model to identify independently prognostic variables,  
235 using forward stepwise selection. Event-free survival curves were examined using the  
236 Kaplan-Meier method and compared with the log-rank test. Statistical analyses were  
237 performed using SPSS Version 28 (Statistical Package for the Social Sciences, International  
238 Business Machines, Inc., Armonk, New York, USA) and GraphPad Prism 9.4.1 (GraphPad



239 Software, Inc., San Diego, California, USA). A two-sided p-value <0.05 was considered as  
240 statistically significant.

241

## 242 **Results**

243 Figure 1 shows a flow chart describing patient inclusion. Of the 623 patients enrolled in the  
244 ATTRaCT study, 523 patients underwent a baseline CMR study. We excluded 168 studies  
245 performed without contrast. An additional 40 patients were excluded due to incomplete  
246 baseline clinical or CMR data sets, alternative diagnosis on the basis of CMR, or loss to  
247 follow-up. In total, 315 subjects (diabetes, n=159; without diabetes, n= 156) were included in  
248 the study cohort.

249

250 The baseline clinical characteristics are shown in Table 1. Compared to patients without  
251 diabetes, patients with diabetes were older ( $60\pm 10$  vs  $56\pm 12$  years,  $p<0.001$ ), more likely to  
252 have a history of hypertension (76 vs 52%,  $p<0.001$ ), coronary artery disease (72 vs 52%,  
253  $p<0.001$ ) and had worse NYHA Functional Class (median Class II vs I,  $p=0.04$ ). Patients  
254 with diabetes had higher creatinine ( $96 [81-118]$  vs  $91 [77-105]$   $\mu\text{mol/L}$ ,  $p=0.02$ ) and  
255 elevated cardiac biomarkers: NT-proBNP ( $1091 [326-2272]$  vs  $579 [232-1136]$   $\text{pg/mL}$ ,  
256  $p<0.001$ ), hs-TnT ( $27 [14-41]$  versus  $15 [9-22]$   $\text{ng/L}$ ,  $p<0.001$ ), GDF-15 ( $2412 [1603-3331]$   
257 versus  $1039 [753-1470]$   $\text{pg/mL}$ ,  $p<0.001$ ), sST2 ( $28 [23-38]$  versus  $26 [21-32]$   $\text{ng/mL}$ ,  
258  $p=0.038$ ) and Gal-3 ( $10.0 [8.0-12.0]$  versus  $8.0 [7.0-10.0]$   $\text{ng/mL}$ ,  $p<0.001$ ). There was no  
259 difference in LV ejection fraction and GLS between the groups. The diabetes group had a  
260 higher prevalence of LGE (76 vs 60%,  $p=0.002$ , driven by higher rates of ischaemic LGE (51  
261 vs 33%,  $p=0.003$ ). Prevalence of non-ischaemic LGE did not differ between the groups. The  
262 diabetes group had higher native T1 ( $1285\pm 42$  vs  $1269\pm 42$  ms,  $p<0.001$ ) and ECV ( $30.5\pm 3.5$   
263 vs  $28.8\pm 4.1\%$ ,  $p<0.001$ ). After adjustment for potential confounders, including age, sex,

264 hypertension and coronary artery disease, diabetes remained independently associated with  
265 the presence of LGE and increased ECV ( $p < 0.005$  for both analyses).

266

### 267 **Predictors of Primary Outcome in All Patients with Heart Failure**

268 Over a median follow-up of 23 [18-24] months, 74 patients experienced the primary outcome  
269 (52 hospitalisations for HF, 22 all-cause deaths). In univariable Cox regression analyses for  
270 the entire cohort, clinical markers associated with the primary outcome included diabetes,  
271 NYHA functional class and systolic blood pressure. Circulating biomarkers associated with  
272 the primary outcome included NT-proBNP, hs-TnT, GDF-15, sST2 and Gal-3. CMR markers  
273 of adverse remodelling (LV mass index and end diastolic volume index), contractile function  
274 (LV ejection fraction and GLS) and myocardial fibrosis (presence of LGE, native T1 and  
275 ECV) were predictors of worse outcomes. Diabetes, NT-proBNP and GLS remained  
276 independently associated with outcomes in the multivariable analysis (Table 2 and Figure 2).

277

### 278 **Predictors of Primary Outcome in Patients with Heart Failure and Diabetes**

279 In the diabetes group, 50 patients experienced the primary outcome (35 hospitalisations for  
280 HF, 15 all-cause deaths). In univariable analyses, systolic blood pressure, NT-proBNP, hs-  
281 TnT, GDF-15, sST2, LV ejection fraction, GLS and native T1 were associated with the  
282 primary outcome (Table 3). GLS and sST2 remained associated with outcomes in the  
283 multivariable analysis. Patients with diabetes and worse than median GLS ( $GLS > -9.9\%$ )  
284 had the worst prognosis (log-rank  $p < 0.001$ , Figure 3). Of note, patients with diabetes and  
285 GLS better than median had similar outcomes to patients without diabetes and GLS worse  
286 than median (Figure 2B;  $p = 0.70$ ).

287

288 In a multivariable model including clinical markers and plasma biomarkers, only sST2  
289 remained independently associated with the primary outcome, demonstrating stronger  
290 prognostic associations than NT-proBNP (Table 4).

291

292 The diabetes group was also stratified into four groups based on GLS (above or below  
293 diabetes group median of -9.7%) and plasma biomarker (above or below median for NT-  
294 proBNP, hs-TnT, GDF-15, sST2 and Gal-3). Amongst patients with above median GLS, NT-  
295 proBNP and GDF-15 showed additional prognostic value (Supplemental Figure 1). On the  
296 other hand, the combination of below median GLS and sST2 demonstrated particularly  
297 adverse prognosis (Supplemental Figure 2).

298

## 299 **Discussion**

300 The main finding of this study is that GLS is a powerful independent predictor of adverse  
301 outcomes in patients with HF and diabetes, providing incremental prognostic information  
302 beyond several circulating plasma biomarkers and CMR markers of cardiac remodelling,  
303 inflammation and fibrosis. In the diabetes group, worse GLS ( $>$  median -9.9%) was  
304 associated with adverse prognosis. GLS is known to have prognostic value in HF, regardless  
305 of whether the cause is ischemic or non-ischemic and whether the EF is reduced or preserved  
306 [14, 15]. In this study, we have extended those findings to the diabetes subgroup, who are  
307 known to have a higher risk of adverse cardiovascular outcomes. Our findings are in  
308 agreement with a prior study which showed that speckle tracking echocardiography (STE)  
309 GLS has prognostic value in diabetes patients with dilated cardiomyopathy [28]. The results  
310 from the current study raise the possibility of GLS-guided risk stratification and management  
311 in patients with HF and diabetes. Indeed, there is emerging evidence of improvement in GLS  
312 with anti-diabetic medications which may enable this in future [28-30].

313

314 GLS by CMR is well-suited for routine clinical use. The technique relies on software  
315 packages which track the endocardial and epicardial borders, and reference values are  
316 specific for the software used for analysis. STE has a number of limitations, including  
317 dependence on high quality 2D images, and results are often affected by foreshortening,  
318 dropout of the apical and anterolateral segments on apical views, and/or suboptimal acoustic  
319 windows [15, 31, 32]. GLS by CMR overcomes these limitations and can be measured from  
320 routinely acquired bright-blood, steady-state free precession long-axis cine imaging.  
321 Disadvantages of GLS by CMR include its susceptibility to through-plane motion artefacts,  
322 limited temporal resolution for quantification of strain rate, and limitations in patients with  
323 contraindications to CMR [15]. Furthermore, GLS by CMR values may be affected by inter-  
324 vendor differences in algorithms, similar to STE, which has resulted in difficulties  
325 establishing reference values [32]. Nonetheless, GLS has shown close correlation with STE  
326 and has become an important component of the CMR examination alongside volumetric  
327 analysis and tissue characterisation in the assessment of HF [33].

328

329 In this study, sST2 demonstrated incremental prognostic value over other biomarkers  
330 including NT-proBNP and hs-TnT in HF patients with diabetes. sST2 is produced by  
331 cardiomyocytes and cardiac fibroblasts in response to myocardial stress, inflammation or  
332 injury [34-36]. Other sources of sST2 include endothelial cells of the aorta and coronary  
333 arteries as well as certain immune cells [34]. It acts as a decoy receptor for interleukin-33,  
334 attenuating its cardioprotective biological effects which include blunting myocardial  
335 hypertrophy and fibrosis, and inhibiting cardiomyocyte apoptosis [18, 34, 37]. We have  
336 confirmed that sST2 levels are higher in HF patients with diabetes [38, 39]. Furthermore,  
337 sST2 has known prognostic value in acute and chronic HF, independent of plasma natriuretic

338 peptides [40-42]. We have extended these findings to the subgroup of HF patients with  
339 diabetes. This result provides further strength to the possibility that the prognostic value of  
340 sST2 in heart failure may result from its association with metabolic perturbances that are also  
341 commonly found in diabetes [43]. Our findings therefore suggest a possible role for sST2 in  
342 risk stratification amongst HF patients with diabetes and in monitoring response to treatment  
343 [44-49].

344

345 Diabetes was a strong independent predictor of the composite outcome of hospitalisation for  
346 HF or all-cause mortality in this HF cohort. This is in agreement with prior studies which  
347 have consistently shown worse cardiovascular outcomes in HF patients with diabetes,  
348 regardless of HF etiology and whether the ejection fraction is reduced or preserved [8, 50,  
349 51]. Furthermore, Kaplan-Meier survival analysis showed similar event rates in the diabetes  
350 group with above median GLS ( $\leq -9.9\%$ ) compared to those without diabetes and below  
351 median GLS. These findings are similar to data from the Candesartan in Heart failure:  
352 Assessment of Reduction in Mortality and morbidity (CHARM) study, which demonstrated  
353 that patients with HF, preserved ejection fraction ( $EF > 40\%$ ), and diabetes had a greater rate  
354 of HF hospitalisation than those with lower ejection fraction ( $EF \leq 40\%$ ) and no diabetes [8].  
355 These findings highlight the urgent need for therapeutic advances in patients with HF and  
356 concomitant diabetes.

357

358 In this study, HF patients with diabetes had worse CMR markers of myocardial injury,  
359 inflammation, and fibrosis. The association between diabetes and elevated ECV remained  
360 after adjusting for potential confounders that differed between the diabetic and non-diabetic  
361 groups including age, hypertension, coronary artery disease and presence of LGE.  
362 Furthermore, diabetes remained associated with the presence of LGE in logistic regression

363 models, even accounting for age, sex, hypertension and coronary artery disease. These  
364 findings are in agreement with prior studies, including a recent meta-analysis, which showed  
365 an association between diabetes and a higher degree of myocardial fibrosis as assessed by  
366 histology as well as ECV by CMR [11].

367

368 Both focal and diffuse myocardial fibrotic processes are known to occur in patients with  
369 diabetes independently of co-morbid conditions, including coronary atherosclerosis and  
370 hypertension. Diffuse interstitial and perivascular fibrosis are structural hallmarks of diabetic  
371 cardiomyopathy, but focal replacement fibrosis can also be seen, even in the absence of  
372 coronary artery disease [52]. Several mechanisms may explain the fibrosis burden in diabetes.  
373 Hyperglycaemia is thought to upregulate the expression of profibrotic factors such as  
374 transforming growth factor beta 1 and down-regulate the activity of the matrix  
375 metalloproteinases [53]. Hyperglycaemia is also known to promote the formation of  
376 advanced glycation end products (AGEs) which can cross-link collagen in the interstitium,  
377 increasing their resistance to degradation. AGEs can result in generation of reactive oxygen  
378 species and oxidative stress which further promotes a pro-fibrotic state [11]. Pro-  
379 inflammatory cytokines and chemokines, as well as increased renin-angiotensin-aldosterone  
380 system activity in diabetes have also been implicated in the development of myocardial  
381 fibrosis.

382

383 Native T1 values were higher in the diabetes group and may reflect interstitial expansion due  
384 to myocardial fibrosis as well as myocardial oedema affecting the cellular and interstitial  
385 compartments [54]. There is some disagreement in the literature regarding whether native T1  
386 values are increased in diabetes. Several studies have shown an association between diabetes  
387 and increased T1 [55-58]. Although a positive association was found between diabetes and

388 native T1 in a recent meta-analysis, the result was not statistically significant [11]. The  
389 authors of that study suggested that the lack of statistical significance may have resulted from  
390 limited sample size of the included studies. Indeed, the diabetes cohort in the present study  
391 was larger than any of those in the included studies. Furthermore, T1 values are known to be  
392 dependent on a variety of factors, including field strength, pulse sequence, and region of  
393 measurement within the myocardium. In the present study, T1 maps were obtained at 3T  
394 using the same MOLLI sequence for all patients, and with experienced observers performing  
395 standardized analyses that may improve reproducibility and eliminate technical cofounders  
396 [59, 60]. Whilst it does appear that diabetes is associated with higher T1, larger studies  
397 controlling for the variability in T1 are required to more conclusively answer this question.

398

#### 399 *Limitations*

400

401 One limitation of this study is the absence of measures of glycaemic control, which are  
402 known to be prognostic in patients with HF and diabetes [61]. However, STE GLS is known  
403 to have prognostic value independent of glycaemic control in diabetes cohorts with preserved  
404 and reduced ejection fraction, and therefore this is unlikely to have altered the prognostic  
405 associations for GLS by CMR [16, 28]. Our HF cohort included patients with both ischaemic  
406 and non-ischaemic etiologies, as well as both preserved and reduced ejection fraction.  
407 Unfortunately, the study was not powered for analyses of these subgroups. Documented  
408 history of coronary artery disease did not associate with outcomes in the univariable analysis  
409 and therefore etiology of HF is unlikely to have affected the results. Finally, this was a single  
410 centre study using feature tracking software from a single vendor, limiting generalizability of  
411 the results.

412

413 **Conclusions**

414 Patients with HF and diabetes had worse CMR and plasma markers of injury, inflammation,  
415 and fibrosis, and an adverse prognosis. sST2 showed incremental prognostic value beyond  
416 NT-proBNP in HF patients with diabetes. GLS is an important and independent prognostic  
417 marker in this group. Future studies should explore whether GLS-guided risk stratification  
418 and management can improve outcomes in this group of patients.

419

420 **Abbreviations**

421 HF: heart failure, GLS: global longitudinal strain, CMR: cardiovascular magnetic resonance, LGE: late  
422 gadolinium enhancement, ECV: extracellular volume; NT-proBNP: N-terminal pro B-type natriuretic peptide,  
423 hs-TnT: high-sensitivity troponin T, GDF-15: growth differentiation factor 15, sST2: soluble ST2, Gal-3:  
424 galectin 3, left ventricle: LV.

425

426 **Declarations**

427 **Ethics approval and consent to participate**

428 Ethics approval was obtained from the local Centralized Institutional Review Board in Singapore, and all  
429 participants provided written informed consent. The study was conducted in accordance with the principles of  
430 the Declaration of Helsinki.

431

432 **Consent for publication**

433 Consent for the publication of images was given.

434

435 **Availability of data and materials**

436 The datasets generated and analysed for the current study are not publicly available. Please contact the  
437 corresponding author for data requests.

438

439 **Competing interests**



440 CSPL is supported by a Clinician Scientist Award from the National Medical Research Council of Singapore;  
441 has received research support from Boston Scientific, Bayer, Roche Diagnostics, AstraZeneca, Medtronic, and  
442 Vifor Pharma; has served as consultant or on the Advisory Board/ Steering Committee/ Executive Committee  
443 for Abbott Diagnostics, Amgen, Applied Therapeutics, AstraZeneca, Bayer, Biofourmis, Boehringer Ingelheim,  
444 Boston Scientific, Corvia Medical, Cytokinetics, Darma Inc., Us2.ai, JanaCare, Janssen Research &  
445 Development LLC, Medtronic, Menarini Group, Merck, MyoKardia, Novartis, Novo Nordisk, Radcliffe Group  
446 Ltd., Roche Diagnostics, Sanofi, Stealth BioTherapeutics, The Corpus, Vifor Pharma and WebMD Global LLC;  
447 and serves as co-founder & non-executive director of Us2.ai. MU is principal investigator for an institutional  
448 research and development agreement regarding cardiovascular magnetic resonance imaging between Karolinska  
449 University Hospital and Siemens. AMR receives research grants, consultancy fees, advisory board fees and/or  
450 laboratory support-in-kind from Roche Diagnostics, Abbott Laboratories, Thermo Fisher, Novo Nordisk,  
451 Sphingotec and Novartis and holds the New Zealand Heart Foundation Chair in Cardiovascular Studies. All  
452 other authors have reported that they have no relationships relevant to the contents of this paper to disclose.

453

#### 454 **Funding**

455 The ATTRaCT study was supported by research grants from A\*STAR Biomedical Research Council ATTRaCT  
456 program [SPF2014/003, SPF2014/004, SPF2014/005] (A\*STAR, Singapore). The funder had no role in study  
457 design, data collection and analysis, decision to publish, or preparation of the manuscript.

458

#### 459 **Authors' contributions**

460 CSPL and AMR designed the study. PJC, FE, RF and CWLC made substantial contributions to the study  
461 design. NRI, SPC, OWL, JPCC, JAB and TTL collected the data. NRI analysed the data. NRI, MU and CWLC  
462 interpreted the data and wrote the manuscript. CC and AMR made substantial revisions to the manuscript. All  
463 authors read and approved the final manuscript.

464

#### 465 **Acknowledgements**

466 The contribution of all the site investigators and clinical co-ordinators is acknowledged.

467

468

469

## 470 **References**

- 471 1. Lam CS, Teng TK, Tay WT, Anand I, Zhang S, Shimizu W, et al. Regional and  
472 ethnic differences among patients with heart failure in Asia: the Asian sudden cardiac death  
473 in heart failure registry. *Eur Heart J*. 2016;37(41):3141-53. Epub 2016/08/10. doi:  
474 10.1093/eurheartj/ehw331. PubMed PMID: 27502121.
- 475 2. Ang N, Chandramouli C, Yiu K, Lawson C, Tromp J. Heart Failure and  
476 Multimorbidity in Asia. *Curr Heart Fail Rep*. 2023;20(1):24-32. Epub 2023/02/23. doi:  
477 10.1007/s11897-023-00585-2. PubMed PMID: 36811820; PubMed Central PMCID:  
478 PMCPMC9977703.
- 479 3. Yap J, Tay WT, Teng TK, Anand I, Richards AM, Ling LH, et al. Association of  
480 Diabetes Mellitus on Cardiac Remodeling, Quality of Life, and Clinical Outcomes in Heart  
481 Failure With Reduced and Preserved Ejection Fraction. *J Am Heart Assoc*.  
482 2019;8(17):e013114. Epub 2019/08/23. doi: 10.1161/JAHA.119.013114. PubMed PMID:  
483 31431116; PubMed Central PMCID: PMCPMC6755825.
- 484 4. Connelly KA, Sarak B. Diabetes and Myocardial Fibrosis: Is CMR the Force Leading  
485 to the Rise of "Scar Wars"? *JACC Cardiovasc Imaging*. 2022;15(5):809-11. Epub  
486 2022/05/06. doi: 10.1016/j.jcmg.2022.01.015. PubMed PMID: 35512953.
- 487 5. Ritchie RH, Abel ED. Basic Mechanisms of Diabetic Heart Disease. *Circ Res*.  
488 2020;126(11):1501-25. Epub 2020/05/22. doi: 10.1161/CIRCRESAHA.120.315913. PubMed  
489 PMID: 32437308; PubMed Central PMCID: PMCPMC7251974.
- 490 6. Rosano GM, Vitale C, Seferovic P. Heart Failure in Patients with Diabetes Mellitus.  
491 *Card Fail Rev*. 2017;3(1):52-5. Epub 2017/08/09. doi: 10.15420/cfr.2016:20:2. PubMed  
492 PMID: 28785476; PubMed Central PMCID: PMCPMC5494155.
- 493 7. Johansson I, Dahlstrom U, Edner M, Nasman P, Ryden L, Norhammar A. Prognostic  
494 Implications of Type 2 Diabetes Mellitus in Ischemic and Nonischemic Heart Failure. *J Am*  
495 *Coll Cardiol*. 2016;68(13):1404-16. Epub 2016/09/24. doi: 10.1016/j.jacc.2016.06.061.  
496 PubMed PMID: 27659462.
- 497 8. MacDonald MR, Petrie MC, Varyani F, Ostergren J, Michelson EL, Young JB, et al.  
498 Impact of diabetes on outcomes in patients with low and preserved ejection fraction heart  
499 failure: an analysis of the Candesartan in Heart failure: Assessment of Reduction in Mortality  
500 and morbidity (CHARM) programme. *Eur Heart J*. 2008;29(11):1377-85. Epub 2008/04/17.  
501 doi: 10.1093/eurheartj/ehn153. PubMed PMID: 18413309.
- 502 9. Chamsi-Pasha MA, Zhan Y, Debs D, Shah DJ. CMR in the Evaluation of Diastolic  
503 Dysfunction and Phenotyping of HFpEF: Current Role and Future Perspectives. *JACC*  
504 *Cardiovasc Imaging*. 2020;13(1 Pt 2):283-96. Epub 2019/06/17. doi:  
505 10.1016/j.jcmg.2019.02.031. PubMed PMID: 31202753.
- 506 10. Kinno M, Nagpal P, Horgan S, Waller AH. Comparison of Echocardiography,  
507 Cardiac Magnetic Resonance, and Computed Tomographic Imaging for the Evaluation of  
508 Left Ventricular Myocardial Function: Part 1 (Global Assessment). *Curr Cardiol Rep*.  
509 2017;19(1):9. Epub 2017/02/09. doi: 10.1007/s11886-017-0815-4. PubMed PMID:  
510 28176279.
- 511 11. Salvador DB, Jr., Gamba MR, Gonzalez-Jaramillo N, Gonzalez-Jaramillo V,  
512 Raguindin PFN, Minder B, et al. Diabetes and Myocardial Fibrosis: A Systematic Review  
513 and Meta-Analysis. *JACC Cardiovasc Imaging*. 2022;15(5):796-808. Epub 2022/05/06. doi:  
514 10.1016/j.jcmg.2021.12.008. PubMed PMID: 35512952.
- 515 12. Marwick TH, Ritchie R, Shaw JE, Kaye D. Implications of Underlying Mechanisms  
516 for the Recognition and Management of Diabetic Cardiomyopathy. *J Am Coll Cardiol*.  
517 2018;71(3):339-51. Epub 2018/01/20. doi: 10.1016/j.jacc.2017.11.019. PubMed PMID:  
518 29348027.

- 519 13. Frojdh F, Fridman Y, Bering P, Sayeed A, Maanja M, Niklasson L, et al. Extracellular  
520 Volume and Global Longitudinal Strain Both Associate With Outcomes But Correlate  
521 Minimally. *JACC Cardiovasc Imaging*. 2020;13(11):2343-54. Epub 2020/06/22. doi:  
522 10.1016/j.jcmg.2020.04.026. PubMed PMID: 32563637.
- 523 14. Romano S, Judd RM, Kim RJ, Kim HW, Klem I, Heitner JF, et al. Feature-Tracking  
524 Global Longitudinal Strain Predicts Death in a Multicenter Population of Patients With  
525 Ischemic and Nonischemic Dilated Cardiomyopathy Incremental to Ejection Fraction and  
526 Late Gadolinium Enhancement. *JACC Cardiovasc Imaging*. 2018;11(10):1419-29. Epub  
527 2018/01/24. doi: 10.1016/j.jcmg.2017.10.024. PubMed PMID: 29361479; PubMed Central  
528 PMCID: PMC6043421.
- 529 15. Kammerlander AA, Dona C, Nitsche C, Koschutnik M, Schonbauer R, Duca F, et al.  
530 Feature Tracking of Global Longitudinal Strain by Using Cardiovascular MRI Improves Risk  
531 Stratification in Heart Failure with Preserved Ejection Fraction. *Radiology*. 2020;296(2):290-  
532 8. Epub 2020/06/03. doi: 10.1148/radiol.2020200195. PubMed PMID: 32484413.
- 533 16. Holland DJ, Marwick TH, Haluska BA, Leano R, Hordern MD, Hare JL, et al.  
534 Subclinical LV dysfunction and 10-year outcomes in type 2 diabetes mellitus. *Heart*.  
535 2015;101(13):1061-6. Epub 2015/05/04. doi: 10.1136/heartjnl-2014-307391. PubMed PMID:  
536 25935767.
- 537 17. Wang Y, Yang H, Huynh Q, Nolan M, Negishi K, Marwick TH. Diagnosis of  
538 Nonischemic Stage B Heart Failure in Type 2 Diabetes Mellitus: Optimal Parameters for  
539 Prediction of Heart Failure. *JACC Cardiovasc Imaging*. 2018;11(10):1390-400. Epub  
540 2018/05/21. doi: 10.1016/j.jcmg.2018.03.015. PubMed PMID: 29778859.
- 541 18. Meijers WC, Bayes-Genis A, Mebazaa A, Bauersachs J, Cleland JGF, Coats AJS, et  
542 al. Circulating heart failure biomarkers beyond natriuretic peptides: review from the  
543 Biomarker Study Group of the Heart Failure Association (HFA), European Society of  
544 Cardiology (ESC). *Eur J Heart Fail*. 2021;23(10):1610-32. Epub 2021/09/10. doi:  
545 10.1002/ejhf.2346. PubMed PMID: 34498368; PubMed Central PMCID: PMC69292239.
- 546 19. Chan MM, Santhanakrishnan R, Chong JP, Chen Z, Tai BC, Liew OW, et al. Growth  
547 differentiation factor 15 in heart failure with preserved vs. reduced ejection fraction. *Eur J*  
548 *Heart Fail*. 2016;18(1):81-8. Epub 2015/10/27. doi: 10.1002/ejhf.431. PubMed PMID:  
549 26497848.
- 550 20. Emdin M, Aimo A, Vergaro G, Bayes-Genis A, Lupon J, Latini R, et al. sST2  
551 Predicts Outcome in Chronic Heart Failure Beyond NT-proBNP and High-Sensitivity  
552 Troponin T. *J Am Coll Cardiol*. 2018;72(19):2309-20. Epub 2018/11/06. doi:  
553 10.1016/j.jacc.2018.08.2165. PubMed PMID: 30384887.
- 554 21. Anand IS, Rector TS, Kuskowski M, Adourian A, Muntendam P, Cohn JN. Baseline  
555 and serial measurements of galectin-3 in patients with heart failure: relationship to prognosis  
556 and effect of treatment with valsartan in the Val-HeFT. *Eur J Heart Fail*. 2013;15(5):511-8.  
557 Epub 2013/01/08. doi: 10.1093/eurjhf/hfs205. PubMed PMID: 23291728.
- 558 22. Le TT, Tan RS, De Deyn M, Goh EP, Han Y, Leong BR, et al. Cardiovascular  
559 magnetic resonance reference ranges for the heart and aorta in Chinese at 3T. *J Cardiovasc*  
560 *Magn Reson*. 2016;18:21. Epub 2016/04/14. doi: 10.1186/s12968-016-0236-3. PubMed  
561 PMID: 27071974; PubMed Central PMCID: PMC6043421.
- 562 23. Zhang S, Le TT, Kabus S, Su B, Hausenloy DJ, Cook SA, et al. Cardiac magnetic  
563 resonance T1 and extracellular volume mapping with motion correction and co-registration  
564 based on fast elastic image registration. *MAGMA*. 2018;31(1):115-29. Epub 2017/12/23. doi:  
565 10.1007/s10334-017-0668-2. PubMed PMID: 29270904; PubMed Central PMCID:  
566 PMC6043421.
- 567 24. Schulz-Menger J, Bluemke DA, Bremerich J, Flamm SD, Fogel MA, Friedrich MG,  
568 et al. Standardized image interpretation and post processing in cardiovascular magnetic

- 569 resonance: Society for Cardiovascular Magnetic Resonance (SCMR) board of trustees task  
570 force on standardized post processing. *J Cardiovasc Magn Reson.* 2013;15(1):35. Epub  
571 2013/05/03. doi: 10.1186/1532-429X-15-35. PubMed PMID: 23634753; PubMed Central  
572 PMCID: PMCPMC3695769.
- 573 25. Ugander M, Oki AJ, Hsu LY, Kellman P, Greiser A, Aletras AH, et al. Extracellular  
574 volume imaging by magnetic resonance imaging provides insights into overt and sub-clinical  
575 myocardial pathology. *Eur Heart J.* 2012;33(10):1268-78. Epub 2012/01/27. doi:  
576 10.1093/eurheartj/ehr481. PubMed PMID: 22279111; PubMed Central PMCID:  
577 PMCPMC3350985.
- 578 26. Arheden H, Saeed M, Higgins CB, Gao DW, Bremerich J, Wyttenbach R, et al.  
579 Measurement of the distribution volume of gadopentetate dimeglumine at echo-planar MR  
580 imaging to quantify myocardial infarction: comparison with <sup>99m</sup>Tc-DTPA autoradiography  
581 in rats. *Radiology.* 1999;211(3):698-708. Epub 1999/06/03. doi:  
582 10.1148/radiology.211.3.r99jn41698. PubMed PMID: 10352594.
- 583 27. Cai J, Bryant JA, Le TT, Su B, de Marvao A, O'Regan DP, et al. Fractal analysis of  
584 left ventricular trabeculations is associated with impaired myocardial deformation in healthy  
585 Chinese. *J Cardiovasc Magn Reson.* 2017;19(1):102. Epub 2017/12/16. doi: 10.1186/s12968-  
586 017-0413-z. PubMed PMID: 29241460; PubMed Central PMCID: PMCPMC5729602.
- 587 28. Tanaka H, Tatsumi K, Matsuzoe H, Matsumoto K, Hirata KI. Impact of diabetes  
588 mellitus on left ventricular longitudinal function of patients with non-ischemic dilated  
589 cardiomyopathy. *Cardiovasc Diabetol.* 2020;19(1):84. Epub 2020/06/15. doi:  
590 10.1186/s12933-020-01063-y. PubMed PMID: 32534593; PubMed Central PMCID:  
591 PMCPMC7293795.
- 592 29. Gamaza-Chulian S, Diaz-Retamino E, Gonzalez-Teston F, Gaitero JC, Castillo MJ,  
593 Alfaro R, et al. Effect of sodium-glucose cotransporter 2 (SGLT2) inhibitors on left  
594 ventricular remodelling and longitudinal strain: a prospective observational study. *BMC*  
595 *Cardiovasc Disord.* 2021;21(1):456. Epub 2021/09/23. doi: 10.1186/s12872-021-02250-9.  
596 PubMed PMID: 34548011; PubMed Central PMCID: PMCPMC8456580.
- 597 30. Tanaka H, Soga F, Tatsumi K, Mochizuki Y, Sano H, Toki H, et al. Positive effect of  
598 dapagliflozin on left ventricular longitudinal function for type 2 diabetic mellitus patients  
599 with chronic heart failure. *Cardiovasc Diabetol.* 2020;19(1):6. Epub 2020/01/09. doi:  
600 10.1186/s12933-019-0985-z. PubMed PMID: 31910853; PubMed Central PMCID:  
601 PMCPMC6947966.
- 602 31. Kalam K, Otahal P, Marwick TH. Prognostic implications of global LV dysfunction:  
603 a systematic review and meta-analysis of global longitudinal strain and ejection fraction.  
604 *Heart.* 2014;100(21):1673-80. Epub 2014/05/27. doi: 10.1136/heartjnl-2014-305538.  
605 PubMed PMID: 24860005.
- 606 32. Taylor RJ, Moody WE, Umar F, Edwards NC, Taylor TJ, Stegemann B, et al.  
607 Myocardial strain measurement with feature-tracking cardiovascular magnetic resonance:  
608 normal values. *Eur Heart J Cardiovasc Imaging.* 2015;16(8):871-81. Epub 2015/02/26. doi:  
609 10.1093/ehjci/jev006. PubMed PMID: 25711353.
- 610 33. Onishi T, Saha SK, Delgado-Montero A, Ludwig DR, Onishi T, Schelbert EB, et al.  
611 Global longitudinal strain and global circumferential strain by speckle-tracking  
612 echocardiography and feature-tracking cardiac magnetic resonance imaging: comparison with  
613 left ventricular ejection fraction. *J Am Soc Echocardiogr.* 2015;28(5):587-96. Epub  
614 2015/01/13. doi: 10.1016/j.echo.2014.11.018. PubMed PMID: 25577185.
- 615 34. Sciatti E, Merlo A, Scangiuzzi C, Limonta R, Gori M, D'Elia E, et al. Prognostic  
616 Value of sST2 in Heart Failure. *J Clin Med.* 2023;12(12). Epub 2023/06/28. doi:  
617 10.3390/jcm12123970. PubMed PMID: 37373664; PubMed Central PMCID:  
618 PMCPMC10299183.

- 619 35. Pascual-Figal DA, Januzzi JL. The biology of ST2: the International ST2 Consensus  
620 Panel. *Am J Cardiol.* 2015;115(7 Suppl):3B-7B. Epub 2015/02/11. doi:  
621 10.1016/j.amjcard.2015.01.034. PubMed PMID: 25665766.
- 622 36. Berezin AE, Berezin AA. Circulating Cardiac Biomarkers in Diabetes Mellitus: A  
623 New Dawn for Risk Stratification-A Narrative Review. *Diabetes Ther.* 2020;11(6):1271-91.  
624 Epub 2020/05/21. doi: 10.1007/s13300-020-00835-9. PubMed PMID: 32430864; PubMed  
625 Central PMCID: PMCPMC7261294.
- 626 37. Aimo A, Januzzi JL, Jr., Bayes-Genis A, Vergaro G, Sciarrone P, Passino C, et al.  
627 Clinical and Prognostic Significance of sST2 in Heart Failure: JACC Review Topic of the  
628 Week. *J Am Coll Cardiol.* 2019;74(17):2193-203. Epub 2019/10/28. doi:  
629 10.1016/j.jacc.2019.08.1039. PubMed PMID: 31648713.
- 630 38. Ky B, French B, McCloskey K, Rame JE, McIntosh E, Shahi P, et al. High-sensitivity  
631 ST2 for prediction of adverse outcomes in chronic heart failure. *Circ Heart Fail.*  
632 2011;4(2):180-7. Epub 2010/12/24. doi: 10.1161/CIRCHEARTFAILURE.110.958223.  
633 PubMed PMID: 21178018; PubMed Central PMCID: PMCPMC3163169.
- 634 39. AbouEzzeddine OF, McKie PM, Dunlay SM, Stevens SR, Felker GM, Borlaug BA,  
635 et al. Suppression of Tumorigenicity 2 in Heart Failure With Preserved Ejection Fraction. *J*  
636 *Am Heart Assoc.* 2017;6(2). Epub 2017/02/20. doi: 10.1161/JAHA.116.004382. PubMed  
637 PMID: 28214792; PubMed Central PMCID: PMCPMC5523750.
- 638 40. Demissei BG, Cotter G, Prescott MF, Felker GM, Filippatos G, Greenberg BH, et al.  
639 A multimarker multi-time point-based risk stratification strategy in acute heart failure: results  
640 from the RELAX-AHF trial. *Eur J Heart Fail.* 2017;19(8):1001-10. Epub 2017/01/31. doi:  
641 10.1002/ejhf.749. PubMed PMID: 28133908.
- 642 41. Aimo A, Vergaro G, Passino C, Ripoli A, Ky B, Miller WL, et al. Prognostic Value of  
643 Soluble Suppression of Tumorigenicity-2 in Chronic Heart Failure: A Meta-Analysis. *JACC*  
644 *Heart Fail.* 2017;5(4):280-6. Epub 2016/11/07. doi: 10.1016/j.jchf.2016.09.010. PubMed  
645 PMID: 27816512.
- 646 42. Aimo A, Vergaro G, Ripoli A, Bayes-Genis A, Pascual Figal DA, de Boer RA, et al.  
647 Meta-Analysis of Soluble Suppression of Tumorigenicity-2 and Prognosis in Acute Heart  
648 Failure. *JACC Heart Fail.* 2017;5(4):287-96. Epub 2017/02/13. doi:  
649 10.1016/j.jchf.2016.12.016. PubMed PMID: 28189578.
- 650 43. Miller AM, Purves D, McConnachie A, Asquith DL, Batty GD, Burns H, et al.  
651 Soluble ST2 associates with diabetes but not established cardiovascular risk factors: a new  
652 inflammatory pathway of relevance to diabetes? *PLoS One.* 2012;7(10):e47830. Epub  
653 2012/11/01. doi: 10.1371/journal.pone.0047830. PubMed PMID: 23112853; PubMed Central  
654 PMCID: PMCPMC3480428.
- 655 44. Gurgozze MT, van Vark LC, Baart SJ, Kardys I, Akkerhuis KM, Manintveld OC, et al.  
656 Multimarker Analysis of Serially Measured GDF-15, NT-proBNP, ST2, GAL-3, cTnI,  
657 Creatinine, and Prognosis in Acute Heart Failure. *Circ Heart Fail.* 2023;16(1):e009526. Epub  
658 2022/11/22. doi: 10.1161/CIRCHEARTFAILURE.122.009526. PubMed PMID: 36408685;  
659 PubMed Central PMCID: PMCPMC9833118.
- 660 45. van Vark LC, Lesman-Leegte I, Baart SJ, Postmus D, Pinto YM, Orsel JG, et al.  
661 Prognostic Value of Serial ST2 Measurements in Patients With Acute Heart Failure. *J Am*  
662 *Coll Cardiol.* 2017;70(19):2378-88. Epub 2017/11/04. doi: 10.1016/j.jacc.2017.09.026.  
663 PubMed PMID: 29096809.
- 664 46. Weir RA, Miller AM, Murphy GE, Clements S, Steedman T, Connell JM, et al.  
665 Serum soluble ST2: a potential novel mediator in left ventricular and infarct remodeling after  
666 acute myocardial infarction. *J Am Coll Cardiol.* 2010;55(3):243-50. Epub 2010/02/02. doi:  
667 10.1016/j.jacc.2009.08.047. PubMed PMID: 20117403.



- 668 47. Gaggin HK, Motiwala S, Bhardwaj A, Parks KA, Januzzi JL, Jr. Soluble  
669 concentrations of the interleukin receptor family member ST2 and beta-blocker therapy in  
670 chronic heart failure. *Circ Heart Fail*. 2013;6(6):1206-13. Epub 2013/10/12. doi:  
671 10.1161/CIRCHEARTFAILURE.113.000457. PubMed PMID: 24114865.
- 672 48. Maisel A, Xue Y, van Veldhuisen DJ, Voors AA, Jaarsma T, Pang PS, et al. Effect of  
673 spironolactone on 30-day death and heart failure rehospitalization (from the COACH Study).  
674 *Am J Cardiol*. 2014;114(5):737-42. Epub 2014/08/19. doi: 10.1016/j.amjcard.2014.05.062.  
675 PubMed PMID: 25129066.
- 676 49. Bayes-Genis A, Aimo A, Jhund P, Richards M, de Boer RA, Arfsten H, et al.  
677 Biomarkers in heart failure clinical trials. A review from the Biomarkers Working Group of  
678 the Heart Failure Association of the European Society of Cardiology. *Eur J Heart Fail*.  
679 2022;24(10):1767-77. Epub 2022/09/09. doi: 10.1002/ejhf.2675. PubMed PMID: 36073112.
- 680 50. Domanski M, Krause-Steinrauf H, Deedwania P, Follmann D, Ghali JK, Gilbert E, et  
681 al. The effect of diabetes on outcomes of patients with advanced heart failure in the BEST  
682 trial. *J Am Coll Cardiol*. 2003;42(5):914-22. Epub 2003/09/06. doi: 10.1016/s0735-  
683 1097(03)00856-8. PubMed PMID: 12957443.
- 684 51. Shindler DM, Kostis JB, Yusuf S, Quinones MA, Pitt B, Stewart D, et al. Diabetes  
685 mellitus, a predictor of morbidity and mortality in the Studies of Left Ventricular Dysfunction  
686 (SOLVD) Trials and Registry. *Am J Cardiol*. 1996;77(11):1017-20. Epub 1996/05/01. doi:  
687 10.1016/s0002-9149(97)89163-1. PubMed PMID: 8644628.
- 688 52. Russo I, Frangogiannis NG. Diabetes-associated cardiac fibrosis: Cellular effectors,  
689 molecular mechanisms and therapeutic opportunities. *J Mol Cell Cardiol*. 2016;90:84-93.  
690 Epub 2015/12/26. doi: 10.1016/j.yjmcc.2015.12.011. PubMed PMID: 26705059; PubMed  
691 Central PMCID: PMC4718740.
- 692 53. Borghetti G, von Lewinski D, Eaton DM, Sourij H, Houser SR, Wallner M. Diabetic  
693 Cardiomyopathy: Current and Future Therapies. *Beyond Glycemic Control*. *Front Physiol*.  
694 2018;9:1514. Epub 2018/11/15. doi: 10.3389/fphys.2018.01514. PubMed PMID: 30425649;  
695 PubMed Central PMCID: PMC6218509.
- 696 54. Haaf P, Garg P, Messroghli DR, Broadbent DA, Greenwood JP, Plein S. Cardiac T1  
697 Mapping and Extracellular Volume (ECV) in clinical practice: a comprehensive review. *J*  
698 *Cardiovasc Magn Reson*. 2016;18(1):89. Epub 2016/12/03. doi: 10.1186/s12968-016-0308-4.  
699 PubMed PMID: 27899132; PubMed Central PMCID: PMC4718740.
- 700 55. Swoboda PP, McDiarmid AK, Erhayiem B, Ripley DP, Dobson LE, Garg P, et al.  
701 Diabetes Mellitus, Microalbuminuria, and Subclinical Cardiac Disease: Identification and  
702 Monitoring of Individuals at Risk of Heart Failure. *J Am Heart Assoc*. 2017;6(7). Epub  
703 2017/07/19. doi: 10.1161/JAHA.117.005539. PubMed PMID: 28716801; PubMed Central  
704 PMCID: PMC4718740.
- 705 56. Cao Y, Zeng W, Cui Y, Kong X, Wang M, Yu J, et al. Increased myocardial  
706 extracellular volume assessed by cardiovascular magnetic resonance T1 mapping and its  
707 determinants in type 2 diabetes mellitus patients with normal myocardial systolic strain.  
708 *Cardiovasc Diabetol*. 2018;17(1):7. Epub 2018/01/06. doi: 10.1186/s12933-017-0651-2.  
709 PubMed PMID: 29301529; PubMed Central PMCID: PMC5755204.
- 710 57. Lam B, Stromp TA, Hui Z, Vandsburger M. Myocardial native-T1 times are elevated  
711 as a function of hypertrophy, HbA1c, and heart rate in diabetic adults without diffuse fibrosis.  
712 *Magn Reson Imaging*. 2019;61:83-9. Epub 2019/05/28. doi: 10.1016/j.mri.2019.05.029.  
713 PubMed PMID: 31125612; PubMed Central PMCID: PMC663625.
- 714 58. Kucukseymen S, Neisius U, Rodriguez J, Tsao CW, Nezafat R. Negative synergism  
715 of diabetes mellitus and obesity in patients with heart failure with preserved ejection fraction:  
716 a cardiovascular magnetic resonance study. *Int J Cardiovasc Imaging*. 2020;36(10):2027-38.  
717 Epub 2020/06/14. doi: 10.1007/s10554-020-01915-4. PubMed PMID: 32533279.

718 59. Kellman P, Hansen MS. T1-mapping in the heart: accuracy and precision. *J*  
719 *Cardiovasc Magn Reson.* 2014;16(1):2. Epub 2014/01/07. doi: 10.1186/1532-429X-16-2.  
720 PubMed PMID: 24387626; PubMed Central PMCID: PMC3927683.  
721 60. Treibel TA, Fridman Y, Bering P, Sayeed A, Maanja M, Frojdh F, et al. Extracellular  
722 Volume Associates With Outcomes More Strongly Than Native or Post-Contrast Myocardial  
723 T1. *JACC Cardiovasc Imaging.* 2020;13(1 Pt 1):44-54. Epub 2019/05/20. doi:  
724 10.1016/j.jcmg.2019.03.017. PubMed PMID: 31103587.  
725 61. Aguilar D, Bozkurt B, Ramasubbu K, Deswal A. Relationship of hemoglobin A1C  
726 and mortality in heart failure patients with diabetes. *J Am Coll Cardiol.* 2009;54(5):422-8.  
727 Epub 2009/07/25. doi: 10.1016/j.jacc.2009.04.049. PubMed PMID: 19628117; PubMed  
728 Central PMCID: PMC3927683.

729

730

731

732

733

734

735

736

737

738

739

740

741

742

743

744

745 **Figure Titles and Legends**

746 **Figure 1. Flow chart of patient inclusion.** Abbreviations: HF: heart failure; ECG: 12-lead  
747 electrocardiogram; CMR: Cardiovascular magnetic resonance; HCM: Hypertrophic  
748 cardiomyopathy.

749 **Figure 2. Event-free survival curves showing:** (A) Adverse prognosis in patients with heart  
750 failure and diabetes; (B) Patients with diabetes and GLS worse than cohort median (-9.9%) had  
751 worst prognosis. Patients with either diabetes or GLS worse than median had similar outcomes.  
752 Abbreviations: DM: diabetes mellitus; GLS: global longitudinal strain

753 **Figure 3. Example of GLS measurement in apical 2-chamber view. Top panel** shows a  
754 patient with heart failure, diabetes and  $GLS \leq -9.9\%$ . **Bottom panel** shows a patient with heart  
755 failure, diabetes and  $GLS > -9.9\%$ . **Centre panel:** event-free survival curves showing adverse  
756 prognosis in patients with heart failure, diabetes and GLS worse than cohort median (-9.9%).  
757 Abbreviations: DM: diabetes mellitus; GLS: global longitudinal strain.

758 **Supplemental Figures**

759 **Supplemental Figure 1. Event-free survival curves in patients with diabetes and above**  
760 **median GLS (-9.7%) stratified by:** (A) NT-proBNP; (B) hs-TnT; (C) GDF-15; (D) sST2 and  
761 (E) Gal-3. NT-proBNP and GDF-15 demonstrated additional prognostic value in this group.  
762 Abbreviations: GLS: global longitudinal strain; NT-proBNP: N-terminal pro-brain natriuretic  
763 peptide; hs-TnT: high-sensitivity troponin T; GDF-15: growth differentiation factor 15; sST2:  
764 soluble ST2; Gal-3: galectin 3.

765 **Supplemental Figure 2. Event-free survival curves in patients with diabetes and below**  
766 **median GLS (-9.7%) stratified by:** (A) NT-proBNP; (B) hs-TnT; (C) GDF-15; (D) sST2 and



767 (E) Gal-3. sST2 demonstrated additional prognostic value in this group. Abbreviations: GLS:  
768 global longitudinal strain; NT-proBNP: N-terminal pro-brain natriuretic peptide; hs-TnT: high-  
769 sensitivity troponin T; GDF-15: growth differentiation factor 15; sST2: soluble ST2; Gal-3:  
770 galectin 3.

771

772

773

774

775

776

777

778

779

780

781

782

783

784

785 Table 1. Baseline clinical characteristics of the cohort according to presence or absence of  
786 diabetes.

|                                    | No Diabetes Mellitus<br>(n=156) | Diabetes Mellitus<br>(n=159) | p Value |
|------------------------------------|---------------------------------|------------------------------|---------|
| <b>Clinical</b>                    |                                 |                              |         |
| Age, years                         | 56 ± 12                         | 60 ± 10                      | <0.001  |
| Male sex, n (%)                    | 129 (83)                        | 126 (79)                     | 0.436   |
| Heart rate, beats/min              | 71 [63-81]                      | 75 [68-83]                   | 0.020   |
| Systolic BP, mmHg                  | 124 [111-138]                   | 125 [113-143]                | 0.240   |
| Diastolic BP, mmHg                 | 73 [66-82]                      | 70 [61-80]                   | 0.008   |
| Body mass index, kg/m <sup>2</sup> | 26 [23-30]                      | 27 [23-31]                   | 0.412   |
| Co-morbidities, n (%)              |                                 |                              |         |
| Hypertension                       | 80 (52)                         | 120 (76)                     | <0.001  |
| Coronary artery disease            | 78 (52)                         | 112 (72)                     | <0.001  |
| Atrial Fibrillation                | 22 (14)                         | 29 (18)                      | 0.331   |
| Medications at baseline, n (%)     |                                 |                              |         |
| Beta Blocker                       | 135 (87)                        | 146 (92)                     | 0.436   |
| ACEi or ARB                        | 129 (83)                        | 140 (88)                     | 0.178   |
| Mineralocorticoid antagonist       | 98 (63)                         | 102 (64)                     | 0.806   |
| Diuretic                           | 116 (74)                        | 129 (81)                     | 0.148   |
| Statin                             | 120 (77)                        | 146 (92)                     | <0.001  |
| NYHA Functional Class, n (%)       |                                 |                              | 0.041   |
| Class I                            | 91 (58)                         | 75 (47)                      |         |
| Class II                           | 51 (33)                         | 74 (47)                      |         |
| Class III                          | 14 (9)                          | 10 (6)                       |         |
| MLWHF Score                        | 12 [0-30]                       | 14 [3-29]                    | 0.299   |
| Haematocrit, (%)                   | 43 ± 5                          | 41 ± 6                       | <0.001  |
| Creatinine, µmol/L                 | 91 [77-105]                     | 96 [81-118]                  | 0.016   |
| <b>Plasma Biomarkers</b>           |                                 |                              |         |

|                           |                 |                  |        |
|---------------------------|-----------------|------------------|--------|
| NT-proBNP, pg/mL          | 579 [232-1136]  | 1091 [326-2272]  | <0.001 |
| hs-TnT, ng/L              | 15 [9-22]       | 27 [14-41]       | <0.001 |
| GDF-15, pg/mL             | 1039 [753-1470] | 2412 [1603-3331] | <0.001 |
| sST2, ng/mL               | 26 [21-32]      | 28 [23-38]       | 0.038  |
| Gal-3, ng/mL              | 8.0 [7.0-10.0]  | 10.0 [8.0-12.0]  | <0.001 |
| <b>CMR Markers</b>        |                 |                  |        |
| LVEDVi, mL/m <sup>2</sup> | 112 [83-142]    | 99 [81-129]      | 0.029  |
| LVESVi, mL/m <sup>2</sup> | 71 [43-105]     | 65 [40-94]       | 0.190  |
| SVi, mL/m <sup>2</sup>    | 39 [32-44]      | 35 [29-42]       | 0.005  |
| LVMi, g/m <sup>2</sup>    | 70 [59-89]      | 67 [55-83]       | 0.125  |
| LV ejection fraction, %   | 36 [25-49]      | 36 [26-49]       | 0.947  |
| GLS, %                    | -10.1 ± 4.1     | -9.8 ± 3.7       | 0.443  |
| LAVi, mL/m <sup>2</sup>   | 48 [38-68]      | 47 [33-65]       | 0.285  |
| LGE Type                  |                 |                  | 0.003  |
| Nil, n (%)                | 63 (40)         | 38 (24)          |        |
| Non-ischaemic, n (%)      | 38 (24)         | 34 (21)          |        |
| Ischaemic, n (%)          | 52 (33)         | 81 (51)          |        |
| Both, n (%)               | 3 (2)           | 6 (4)            |        |
| Native T1, ms             | 1269 ± 42       | 1285 ± 42        | <0.001 |
| ECV, %                    | 28.8 ± 4.1      | 30.5 ± 3.5       | <0.001 |

787 Values are given as median [interquartile range], mean ± SD or number (percentage).  
788 **Abbreviations**: ACEi: Angiotensin-converting enzyme inhibitor; ARB: Angiotensin II receptor  
789 blocker; NYHA: New York Heart Association; MLWHF: Minnesota Living with Heart Failure;  
790 NT-proBNP: N-terminal pro-brain natriuretic peptide; hs-TnT: high-sensitivity troponin T; GDF-  
791 15: growth differentiation factor 15; sST2: soluble ST2; Gal-3: galectin 3; LVEDVi: Left  
792 ventricular end-diastolic volume indexed to body surface area; LVESVi: Left ventricular end-  
793 systolic volume index; SVi: Stroke volume index; LVMi: Left ventricular mass index; GLS:  
794 Global longitudinal strain; LAVi: Left atrial end-systolic volume index; LGE: Late gadolinium  
795 enhancement; ECV: Extracellular volume.

796  
797  
798  
799  
800  
801

802 Table 2. Univariable and multivariable Cox regression models (stepwise selection) in the  
803 entire cohort for the primary outcome of all-cause mortality or heart failure hospitalisation.

|                                                | Univariable Model   |         | Multivariable Model (n=314) |         |
|------------------------------------------------|---------------------|---------|-----------------------------|---------|
|                                                | HR (95% CI)         | P Value | HR (95% CI)                 | p Value |
| <b>Clinical</b>                                |                     |         |                             |         |
| Age (per 10-year increment)                    | 1.20<br>(0.97-1.47) | 0.101   |                             |         |
| Male sex                                       | 0.82<br>(0.44-1.53) | 0.537   |                             |         |
| Body mass index                                | 0.97<br>(0.93-1.01) | 0.137   |                             |         |
| Smoking                                        | 1.17<br>(0.74-1.86) | 0.503   |                             |         |
| Hypertension                                   | 0.86<br>(0.54-1.37) | 0.528   |                             |         |
| Diabetes                                       | 2.33<br>(1.43-3.79) | <0.001  | 2.30<br>(1.41-3.74)         | <0.001  |
| Coronary artery disease                        | 1.54<br>(0.94-2.53) | 0.090   |                             |         |
| NYHA Functional Class                          | 1.61<br>(1.15-2.25) | 0.006   | §                           |         |
| Systolic blood pressure (per 10mmHg increment) | 0.88<br>(0.78-0.98) | 0.020   | §                           |         |
| <b>Plasma Biomarkers</b>                       |                     |         |                             |         |
| NT-proBNP (per 100pg/mL increment)             | 1.01<br>(1.01-1.02) | <0.001  | 1.01<br>(1.00-1.01)         | 0.02    |
| hs-TnT (per 1ng/L increment)                   | 1.01<br>(1.01-1.02) | <0.001  | §                           |         |
| GDF-15 (per 100pg/mL increment)                | 1.02<br>(1.01-1.03) | <0.001  | §                           |         |
| sST2 (per 1ng/mL increment)                    | 1.02<br>(1.01-1.04) | 0.004   | §                           |         |
| Gal-3 (per 1ng/mL increment)                   | 1.09<br>(1.04-1.14) | <0.001  | §                           |         |
| <b>CMR Markers</b>                             |                     |         |                             |         |
| LVEDVi (per 10mL/m <sup>2</sup> increment)     | 1.07<br>(1.03-1.12) | <0.001  | §                           |         |
| LVMi (per 10g/m <sup>2</sup> increment)        | 1.10<br>(1.01-1.22) | 0.032   | §                           |         |
| LV ejection fraction (per 5% increment)        | 0.90<br>(0.83-1.00) | 0.010   | §                           |         |
| GLS                                            | 1.16<br>(1.09-1.24) | <0.001  | 1.14<br>(1.06-1.22)         | <0.001  |
| Presence of LGE                                | 1.94<br>(1.10-3.42) | 0.022   | §                           |         |
| Native T1 (per 10ms increment)                 | 1.09<br>(1.04-1.15) | <0.001  | §                           |         |
| ECV                                            | 1.06<br>(1.02-1.11) | 0.005   | §                           |         |

804 **Abbreviations**; NYHA: New York Heart Association; NT-proBNP: N-terminal pro-brain  
 805 natriuretic peptide; hs-TnT: high-sensitivity troponin T; GDF-15: growth differentiation  
 806 factor 15; sST2: soluble ST2; Gal-3: galectin 3; LVEDVi: Left ventricular end-diastolic  
 807 volume indexed to body surface area; LVMI: Left ventricular mass index; GLS: Global  
 808 longitudinal strain; LGE: Late gadolinium enhancement; ECV: Extracellular volume.  
 809 § Assessed for inclusion in multivariable model but not retained.

810  
 811

812 Table 3. Univariable and multivariable Cox regression models (stepwise selection) in the  
 813 diabetes group for the primary outcome of all-cause mortality or heart failure  
 814 hospitalisation.

|                                                | Univariable Model   |         | Multivariable Model (n=158) |         |
|------------------------------------------------|---------------------|---------|-----------------------------|---------|
|                                                | HR (95% CI)         | P Value | HR (95% CI)                 | p Value |
| <b>Clinical</b>                                |                     |         |                             |         |
| Age (per 10-year increment)                    | 1.21<br>(0.90-1.60) | 0.202   |                             |         |
| Male sex                                       | 0.85<br>(0.41-1.75) | 0.665   |                             |         |
| Body mass index                                | 0.99<br>(0.94-1.05) | 0.827   |                             |         |
| Hypertension                                   | 0.94<br>(0.50-1.76) | 0.838   |                             |         |
| Diabetes Type                                  | 0.88<br>(0.28-2.84) | 0.836   |                             |         |
| Smoking                                        | 0.80<br>(0.46-1.40) | 0.436   |                             |         |
| Coronary artery disease                        | 1.41<br>(0.72-2.75) | 0.314   |                             |         |
| NYHA Functional Class                          | 1.34<br>(0.86-2.08) | 0.200   |                             |         |
| Systolic blood pressure (per 10mmHg increment) | 0.86<br>(0.75-0.98) | 0.028   | §                           |         |
| <b>Plasma Biomarkers</b>                       |                     |         |                             |         |
| NT-proBNP (per 100pg/mL increment)             | 1.01<br>(1.00-1.02) | 0.007   | §                           |         |
| hs-TnT (per 1ng/L increment)                   | 1.01<br>(1.00-1.02) | 0.016   | §                           |         |
| GDF-15 (per 100pg/mL increment)                | 1.02<br>(1.01-1.03) | 0.003   | §                           |         |
| sST2 (per 1ng/mL increment)                    | 1.03<br>(1.01-1.06) | 0.003   | 1.03<br>(1.00-1.06)         | 0.02    |
| Gal-3 (per 1ng/mL increment)                   | 1.06<br>(1.00-1.12) | 0.061   |                             |         |
| <b>CMR Markers</b>                             |                     |         |                             |         |
| LVEDVi (per 10mL/m <sup>2</sup> increment)     | 1.07<br>(0.99-1.15) | 0.076   |                             |         |
| LVMI (per 10g/m <sup>2</sup> increment)        | 1.01<br>(0.88-1.15) | 0.928   |                             |         |

|                                         |                     |       |                     |      |
|-----------------------------------------|---------------------|-------|---------------------|------|
| LV ejection fraction (per 5% increment) | 0.89<br>(0.81-0.99) | 0.031 | §                   |      |
| GLS                                     | 1.15<br>(1.06-1.25) | 0.001 | 1.12<br>(1.03-1.21) | 0.01 |
| Presence of LGE                         | 1.42<br>(0.69-2.92) | 0.342 |                     |      |
| Native T1 (per 10ms increment)          | 1.07<br>(1.00-1.14) | 0.04  | §                   |      |
| ECV                                     | 1.06<br>(0.98-1.15) | 0.139 |                     |      |

815 **Abbreviations:**; NYHA: New York Heart Association; NT-proBNP: N-terminal pro-brain  
816 natriuretic peptide; hs-TnT: high-sensitivity troponin T; GDF-15: growth differentiation  
817 factor 15; sST2: soluble ST2; Gal-3: galectin 3; LVEDVi: Left ventricular end-diastolic  
818 volume indexed to body surface area; LVMI: Left ventricular mass index; GLS: Global  
819 longitudinal strain; LGE: Late gadolinium enhancement; ECV: Extracellular volume.  
820 § Assessed for inclusion in multivariable model but not retained.

821

822

823 Table 4. Multivariable Cox regression model (Clinical and Plasma biomarkers) in the diabetes

824 group for the primary outcome of all-cause mortality or heart failure hospitalisation.

|                                                | Multivariable Model<br>(n=158) |         |
|------------------------------------------------|--------------------------------|---------|
|                                                | HR (95% CI)                    | p Value |
| <b>Clinical</b>                                |                                |         |
| Age (per 10-year increment)                    |                                |         |
| Male sex                                       |                                |         |
| Body mass index                                |                                |         |
| Hypertension                                   |                                |         |
| Diabetes Type                                  |                                |         |
| Smoking                                        |                                |         |
| Coronary artery disease                        |                                |         |
| NYHA Functional Class                          |                                |         |
| Systolic blood pressure (per 10mmHg increment) | §                              |         |
| <b>Plasma Biomarkers</b>                       |                                |         |
| NT-proBNP (per 100pg/mL increment)             | §                              |         |
| high-sensitivity troponin T                    | §                              |         |
| GDF-15 (per 100pg/mL increment)                | §                              |         |
| sST2                                           | 1.04<br>(1.02-1.07)            | 0.001   |

Gal-3

825 **Abbreviations:**; NYHA: New York Heart Association; NT-proBNP: N-terminal pro-brain  
826 natriuretic peptide; hs-TnT: high-sensitivity troponin T; GDF-15: growth differentiation  
827 factor 15; sST2: soluble ST2; Gal-3: galectin 3.

828 § Assessed for inclusion in multivariable model but not retained.

829

830

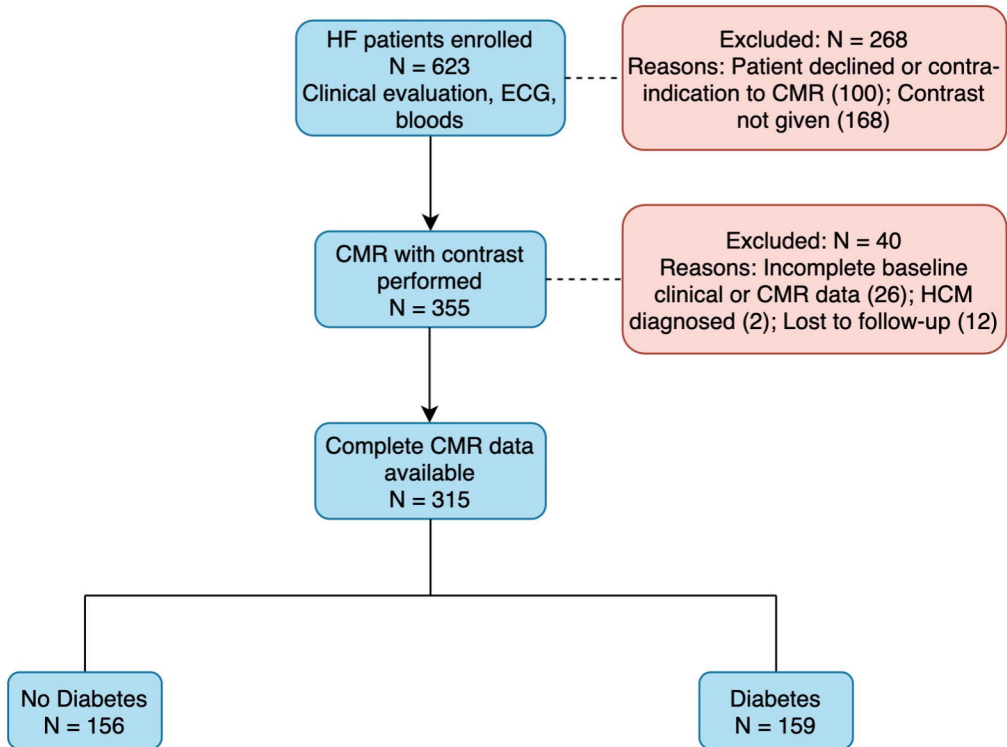



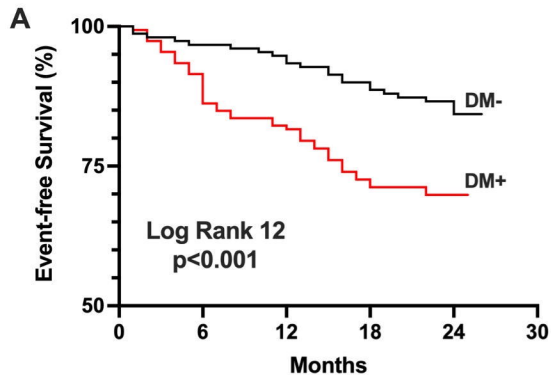

|     | 0   | 6   | 12  | 18  | 24 |
|-----|-----|-----|-----|-----|----|
| DM- | 156 | 147 | 142 | 132 | 76 |
| DM+ | 159 | 139 | 125 | 105 | 49 |

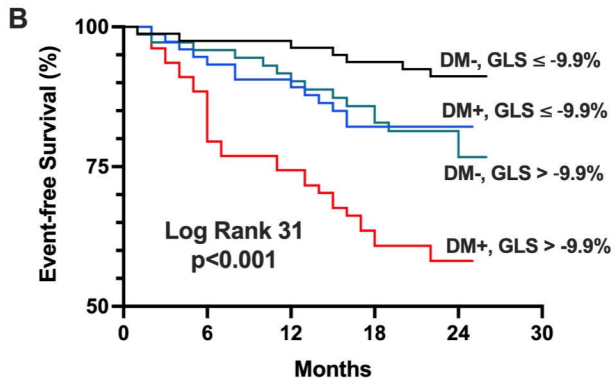

|                       | 0  | 6  | 12 | 18 | 24 |
|-----------------------|----|----|----|----|----|
| DM-, GLS $\leq$ -9.9% | 81 | 78 | 77 | 74 | 41 |
| DM+, GLS $\leq$ -9.9% | 78 | 70 | 67 | 58 | 30 |
| DM-, GLS $>$ -9.9%    | 75 | 69 | 65 | 58 | 35 |
| DM+, GLS $>$ -9.9%    | 81 | 69 | 58 | 47 | 19 |

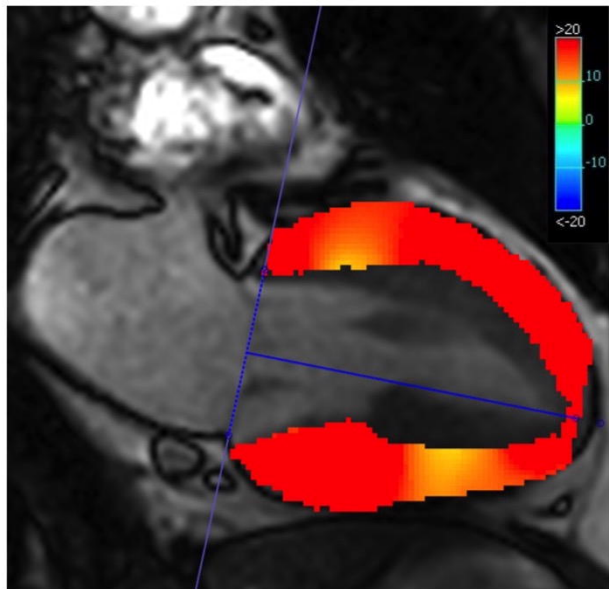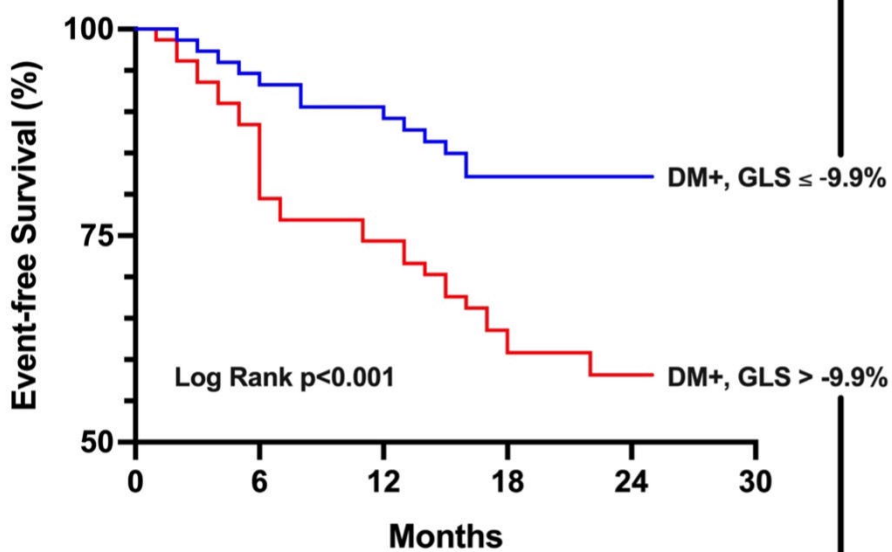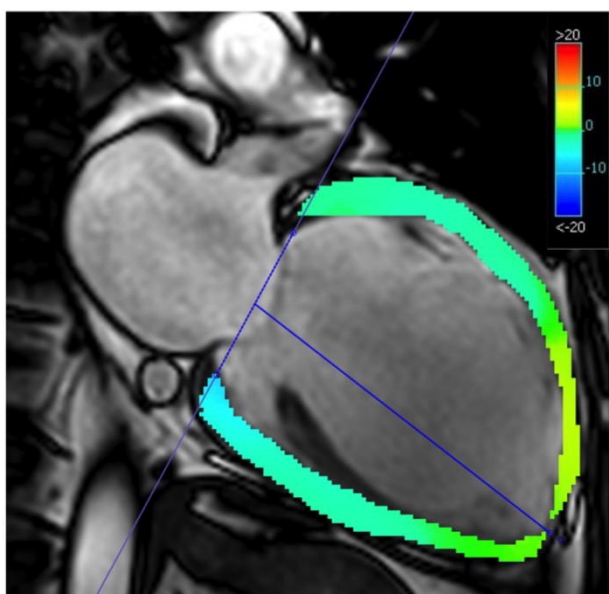

Source: https://medrxiv.org/content/10.1101/2023.03.20.23287472v3.full.pdf
